# Supplementary material
Source: Research Square preprint supplement (doi:10.21203/rs.3.rs-8973876/v1)
Supplement: Supplementary file 1 [file 130695ca13d7f35d6ad7106f.docx]

Table S1 Adverse drug reactions in the safety data set

| Characteristics n(%)of  patients with event | Grade 1-2 | Grade 3 | Grade 4 |
| --- | --- | --- | --- |
| anemia | 10（71） | 0 | 0 |
| leukopenia | 4（29） | 1 (7) | 1 (7) |
| thrombocytopenia | 2（14） | 0 | 0 |
| hypoproteinemia | 6（43） | 0 | 0 |
| liver dysfunction | 3（21） | 0 | 0 |
| hyperlipidaemia | 4 (29) | 0 | 0 |
| hypercholesteremia | 3 (21) | 0 | 0 |
| hyperglycemia | 3 (21) | 0 | 0 |
| gastrointestinal reaction | 5 (36) | 0 | 0 |
| constipation | 4 (29) | 0 | 0 |
| hyperuricemia | 1 (7) | 0 | 0 |
| cerebral infarction | 1 (7) | 0 | 0 |
| arrhythmia cordis | 1 (7) | 0 | 0 |
| fever | 1 (7) | 0 | 0 |
| pruritus | 0 | 1 (7) | 0 |
| renal insufficiency | 2 (14) | 0 | 0 |
| Immune enteritis | 1 (7) | 0 | 0 |
