# Supplementary material
Source: Research Square preprint supplement (doi:10.21203/rs.3.rs-8973876/v1)
Supplement: Supplementary file 2 [file 601ffae93b8d8d8aefd4e31a.docx]

Table S2 The summary of reads and eccDNA count in each tissue sample

| Reads or count | HG401 | HG708 | HG407 | HG886 | HG1116 | HG1129 | HG1178 | HG1081 | HG1371 | HG1274 | HG1375 | HG1410 | HG1402 |
| --- | --- | --- | --- | --- | --- | --- | --- | --- | --- | --- | --- | --- | --- |
| Raw reads | 82238484 | 62604180 | 80841441 | 111103079 | 129558554 | 84489596 | 70174592 | 60485622 | 66443428 | 202454314 | 79091198 | 61574072 | 50511112 |
| MappedReads | 74702147 | 59999048 | 72904749 | 110932834 | 126892720 | 75928292 | 62654906 | 57307021 | 59929252 | 181958533 | 74240358 | 50417174 | 47048870 |
| EccDNA count | 30794 | 2037 | 14965 | 1881 | 2339 | 32363 | 11756 | 8436 | 9001 | 53384 | 11249 | 549 | 5944 |

EccDNA：extrachromosomal circular DNA
