# Supplementary material
Source: Research Square preprint supplement (doi:10.21203/rs.3.rs-8973876/v1)
Supplement: Supplementary file 3 [file a44871c9d4b8a7b0dfa6924b.docx]

Table S3 Differentially expressed genes oriented EccDNA

| Gene | logFC | t | P.Value | adj.P.Val | B |
| --- | --- | --- | --- | --- | --- |
| KRTAP5-9 | 8.285402219 | 3.936432374 | 0.002571679 | 0.999702862 | -4.588547001 |
| RNU6-76 | 8.164906927 | 3.879184511 | 0.002829212 | 0.999702862 | -4.58863811 |
| LIPK | 8.144658243 | 3.869564269 | 0.002875062 | 0.999702862 | -4.588653601 |
| PNLIPRP2 | 7.672425342 | 3.645204264 | 0.004195259 | 0.999702862 | -4.589029959 |
| MCMBP | 7.672425342 | 3.645204264 | 0.004195259 | 0.999702862 | -4.589029959 |
| CAGE1 | 7.646160816 | 4.323882285 | 0.001104099 | 0.999702862 | -4.585035277 |
| CCDC116 | 7.400652093 | 4.068975051 | 0.001714542 | 0.999702862 | -4.585577434 |
| GSX2 | 7.348728154 | 3.491414255 | 0.005452176 | 0.999702862 | -4.589305081 |
| KRBA2 | 7.339850003 | 3.487196204 | 0.00549168 | 0.999702862 | -4.589312828 |
| MMP15 | 7.338859821 | 4.209424019 | 0.001344038 | 0.999702862 | -4.585272925 |
| ACAT1 | 7.294620749 | 3.46570758 | 0.005697558 | 0.999702862 | -4.58935246 |
| C17orf51 | 7.294620749 | 3.46570758 | 0.005697558 | 0.999702862 | -4.58935246 |
| NUDCD1 | 7.27456142 | 4.167222455 | 0.001445693 | 0.999702862 | -4.585362909 |
| GABRR1 | 7.263738503 | 4.169889284 | 0.001439038 | 0.999702862 | -4.585357184 |
| SSFA2 | 7.256370231 | 3.739720915 | 0.003060264 | 0.999702862 | -4.586349625 |
| TPMT | 7.159871337 | 3.401687519 | 0.006359342 | 0.999702862 | -4.589472204 |
| IPPK | 7.033423002 | 3.341611339 | 0.007052297 | 0.999702862 | -4.589586852 |
| KDM1B | 6.977279923 | 3.314937506 | 0.007384377 | 0.999702862 | -4.589638467 |
| MIR744 | 6.741466986 | 3.202901705 | 0.00896376 | 0.999702862 | -4.58986005 |
| ALDH7A1 | 6.62935662 | 3.149637559 | 0.009831808 | 0.999702862 | -4.589968111 |
| MUT | 6.62935662 | 3.149637559 | 0.009831808 | 0.999702862 | -4.589968111 |
| ZNF432 | 6.569855608 | 3.121368357 | 0.010326842 | 0.999702862 | -4.590026172 |
| ANKRD39 | 6.569855608 | 3.121368357 | 0.010326842 | 0.999702862 | -4.590026172 |
| MGAM | 6.518984387 | 3.841755293 | 0.002202718 | 0.999702862 | -4.58449591 |
| FIGLA | 6.475733431 | 3.076650481 | 0.011162262 | 0.999702862 | -4.590119019 |
| RUFY1 | 6.471806851 | 3.711105643 | 0.003219964 | 0.999702862 | -4.586420728 |
| PHAX | 6.434628228 | 3.057121211 | 0.011548348 | 0.999702862 | -4.590159952 |
| STEAP2 | 6.421175172 | 3.669964269 | 0.003464743 | 0.999702862 | -4.586524099 |
| IFI16 | 6.375039431 | 3.028810303 | 0.012132242 | 0.999702862 | -4.590219705 |
| ZBTB37 | 6.375039431 | 3.028810303 | 0.012132242 | 0.999702862 | -4.590219705 |
| CENPQ | 6.339850003 | 3.012091645 | 0.012491019 | 0.999702862 | -4.590255221 |
| TSIX | 6.285402219 | 2.986223254 | 0.013067442 | 0.999702862 | -4.590310508 |
| RANBP6 | 6.277158225 | 2.982306495 | 0.013157035 | 0.999702862 | -4.590318914 |
| CD6 | 6.159505662 | 2.367719467 | 0.036498327 | 0.999702862 | -4.590481838 |
| CYB5R3 | 6.155541083 | 2.924525636 | 0.014553231 | 0.999702862 | -4.590444 |
| SNORA42 | 6.116060542 | 3.016216109 | 0.011274756 | 0.999702862 | -4.588350531 |
| EPX | 6.106248193 | 3.431887137 | 0.005308923 | 0.999702862 | -4.587149073 |
| C22orf43 | 5.956779471 | 2.830093088 | 0.017164075 | 0.999702862 | -4.59065271 |
| BMP5 | 5.954303534 | 2.983571202 | 0.011964582 | 0.999702862 | -4.588450734 |
| OSBP | 5.868014096 | 2.787920254 | 0.018477417 | 0.999702862 | -4.590747603 |
| TLX1NB | 5.781359714 | 2.746750362 | 0.019856555 | 0.999702862 | -4.590841222 |
| FTSJ2 | 5.748177244 | 3.168632557 | 0.008547061 | 0.999702862 | -4.58789381 |
| SCRT2 | 5.731319031 | 2.722975805 | 0.02069935 | 0.999702862 | -4.590895721 |
| DSC3 | 5.696397464 | 3.148191124 | 0.008870197 | 0.999702862 | -4.587953988 |
| KIAA0895 | 5.645675571 | 3.998816248 | 0.001424328 | 0.999702862 | -4.576656535 |
| LOC100130776 | 5.64385619 | 2.68142181 | 0.022258986 | 0.999702862 | -4.590991731 |
| UMOD | 5.639728304 | 2.679460633 | 0.022335419 | 0.999702862 | -4.590996286 |
| BTN3A1 | 5.632514471 | 3.075213593 | 0.010127815 | 0.999702862 | -4.588171556 |
| NOTUM | 5.596189756 | 2.65877527 | 0.023157673 | 0.999702862 | -4.591044454 |
| ANKRD24 | 5.596189756 | 2.65877527 | 0.023157673 | 0.999702862 | -4.591044454 |
| TLR9 | 5.584962501 | 2.65344115 | 0.023374544 | 0.999702862 | -4.591056912 |
| C9orf86 | 5.506032031 | 2.615940924 | 0.02495719 | 0.999702862 | -4.591144929 |
| FAM203A | 5.505780032 | 3.297925283 | 0.006091025 | 0.999702862 | -4.583271446 |
| HEATR7A | 5.505780032 | 3.297925283 | 0.006091025 | 0.999702862 | -4.583271446 |
| SLC9C2 | 5.457608883 | 2.592934866 | 0.025980247 | 0.999702862 | -4.591199293 |
| ARFGEF2 | 5.448460501 | 2.835927864 | 0.015651556 | 0.999702862 | -4.588914093 |
| VPS37C | 5.392317423 | 2.561914595 | 0.02742567 | 0.999702862 | -4.591273027 |
| SH2D4B | 5.383704292 | 2.557822458 | 0.027622186 | 0.999702862 | -4.59128279 |
| FAM20C | 5.373696897 | 2.592214517 | 0.024360561 | 0.999702862 | -4.589713187 |
| NUDT1 | 5.324178791 | 2.822186044 | 0.016047669 | 0.999702862 | -4.588958048 |
| ANKRD23 | 5.285402219 | 2.511118694 | 0.029965848 | 0.999702862 | -4.591394813 |
| AP1AR | 5.281121212 | 3.031262635 | 0.01097039 | 0.999702862 | -4.588304626 |
| ZNF187 | 5.239890132 | 3.00618504 | 0.011482366 | 0.999702862 | -4.588381233 |
| AMICA1 | 5.237342763 | 2.488285428 | 0.031181872 | 0.999702862 | -4.591449968 |
| DCAF12 | 5.230840208 | 3.122323386 | 0.008483056 | 0.999702862 | -4.584091571 |
| CROCCP2 | 5.172538275 | 3.222134881 | 0.006432472 | 0.999702862 | -4.580848825 |
| SPRR3 | 5.169925001 | 2.456254942 | 0.032969782 | 0.999702862 | -4.591527756 |
| TAOK3 | 5.167059668 | 2.454893609 | 0.033047958 | 0.999702862 | -4.591531073 |
| STARD5 | 5.126704473 | 2.435720672 | 0.034168467 | 0.999702862 | -4.591577874 |
| RPS24 | 5.115477217 | 2.430386551 | 0.034486764 | 0.999702862 | -4.591590925 |
| PIWIL1 | 5.101538026 | 2.423763978 | 0.034885983 | 0.999702862 | -4.591607145 |
| MPG | 5.096861539 | 2.421542158 | 0.035020928 | 0.999702862 | -4.591612591 |
| RHBDF1 | 5.096861539 | 2.421542158 | 0.035020928 | 0.999702862 | -4.591612591 |
| ZNF300 | 5.087462841 | 2.417076794 | 0.035293683 | 0.999702862 | -4.591623543 |
| HERPUD2 | 5.087462841 | 2.417076794 | 0.035293683 | 0.999702862 | -4.591623543 |
| CXorf41 | 4.994981925 | 2.373138689 | 0.038090574 | 0.999702862 | -4.591731772 |
| HLTF | 4.972956968 | 2.897136473 | 0.012974823 | 0.999702862 | -4.587668961 |
| MIR3150A | 4.967432138 | 2.360049659 | 0.038964737 | 0.999702862 | -4.591764171 |
| MIR570 | 4.95419631 | 2.353761257 | 0.039391627 | 0.999702862 | -4.591779762 |
| TBCE | 4.95093626 | 2.843023845 | 0.015450838 | 0.999702862 | -4.58889145 |
| KCNJ14 | 4.938599455 | 2.34635112 | 0.039900505 | 0.999702862 | -4.591798154 |
| PTGDS | 4.938599455 | 2.34635112 | 0.039900505 | 0.999702862 | -4.591798154 |
| GSDMB | 4.906890596 | 2.331286096 | 0.040954839 | 0.999702862 | -4.591835614 |
| SH3GL1 | 4.905404812 | 2.81565294 | 0.01623947 | 0.999702862 | -4.588978992 |
| LOC100190940 | 4.861086906 | 2.309524554 | 0.042525706 | 0.999702862 | -4.591889883 |
| CACTIN | 4.860442752 | 2.768804381 | 0.017683235 | 0.999702862 | -4.589130087 |
| DHDDS | 4.857980995 | 2.308048922 | 0.042634315 | 0.999702862 | -4.591893569 |
| SNORD50A | 4.857980995 | 2.308048922 | 0.042634315 | 0.999702862 | -4.591893569 |
| SNHG5 | 4.857980995 | 2.308048922 | 0.042634315 | 0.999702862 | -4.591893569 |
| SNORD50B | 4.857980995 | 2.308048922 | 0.042634315 | 0.999702862 | -4.591893569 |
| CPEB4 | 4.828423197 | 3.220744033 | 0.006449973 | 0.999702862 | -4.580857101 |
| BEST4 | 4.807354922 | 2.283996244 | 0.044442944 | 0.999702862 | -4.591953775 |
| TTLL10 | 4.807354922 | 2.283996244 | 0.044442944 | 0.999702862 | -4.591953775 |
| CCR3 | 4.794357318 | 2.562844971 | 0.02568963 | 0.999702862 | -4.589812122 |
| CHMP5 | 4.770073906 | 2.266283863 | 0.045822018 | 0.999702862 | -4.591998245 |
| BAG1 | 4.770073906 | 2.266283863 | 0.045822018 | 0.999702862 | -4.591998245 |
| CKMT2 | 4.754887502 | 2.259068733 | 0.046395547 | 0.999702862 | -4.592016392 |
| RPS16P5 | 4.754887502 | 2.259068733 | 0.046395547 | 0.999702862 | -4.592016392 |
| MAP2K4 | 4.753022959 | 2.424684579 | 0.031399497 | 0.999702862 | -4.587673567 |
| CDHR3 | 4.739916888 | 2.780506432 | 0.015205563 | 0.999702862 | -4.583602312 |
| RAPGEF2 | 4.706925292 | 2.732984869 | 0.017670482 | 0.999702862 | -4.586033383 |
| CACNG5 | 4.704846996 | 2.661305888 | 0.02149448 | 0.999702862 | -4.589482581 |
| TSTD2 | 4.680485112 | 2.223719819 | 0.049306872 | 0.999702862 | -4.592105556 |
| PARP4 | 4.675957033 | 2.221568508 | 0.049489616 | 0.999702862 | -4.592110996 |
| DNAJB5 | 4.665397181 | 2.484890555 | 0.029570824 | 0.999702862 | -4.590077203 |
| KIAA2026 | 4.654601976 | 2.603287833 | 0.023877165 | 0.999702862 | -4.589676024 |
| EFHD1 | 4.598352103 | 2.830280282 | 0.014716364 | 0.999702862 | -4.587922764 |
| CD101 | 4.59629738 | 2.603165792 | 0.023882441 | 0.999702862 | -4.589676433 |
| LRCH3 | 4.57205597 | 2.614213264 | 0.02340946 | 0.999702862 | -4.589639432 |
| ANO1 | 4.564611867 | 2.573408735 | 0.023821329 | 0.999702862 | -4.588928194 |
| SMYD4 | 4.559218544 | 2.600038569 | 0.024018024 | 0.999702862 | -4.589686921 |
| TTBK2 | 4.545308275 | 2.192608612 | 0.049840734 | 0.999702862 | -4.59109792 |
| LEMD1 | 4.525277049 | 2.562262746 | 0.025716684 | 0.999702862 | -4.589814089 |
| CLOCK | 4.514175054 | 2.591395877 | 0.024396677 | 0.999702862 | -4.589715938 |
| EXOC3L4 | 4.482179348 | 2.567526024 | 0.025473136 | 0.999702862 | -4.589796318 |
| LDB3 | 4.452156026 | 3.232618228 | 0.006889094 | 0.999702862 | -4.583572203 |
| LOC100287225 | 4.425078653 | 2.541230221 | 0.02671288 | 0.999702862 | -4.589885268 |
| SLC25A20 | 4.374096425 | 2.481698696 | 0.029741368 | 0.999702862 | -4.59008813 |
| DARS2 | 4.371606871 | 2.510090538 | 0.028257414 | 0.999702862 | -4.589991129 |
| CDCA7L | 4.298494185 | 2.561534372 | 0.024354612 | 0.999702862 | -4.586936133 |
| PM20D2 | 4.293338825 | 2.459281333 | 0.030966411 | 0.999702862 | -4.590165034 |
| SLC18A2 | 4.285657978 | 2.455140563 | 0.031197999 | 0.999702862 | -4.590179269 |
| ABCA12 | 4.285155637 | 2.392513204 | 0.034912472 | 0.999702862 | -4.590395643 |
| ESPNP | 4.238214894 | 2.420295757 | 0.0332146 | 0.999702862 | -4.590299411 |
| LOC153910 | 4.225251065 | 3.042620148 | 0.009860452 | 0.999702862 | -4.58447565 |
| NRIP1 | 4.188610287 | 2.266730486 | 0.043704683 | 0.999702862 | -4.590835723 |
| MEF2BNB-MEF2B | 4.178135283 | 2.344692928 | 0.038033255 | 0.999702862 | -4.590562145 |
| SEPT10 | 4.173486499 | 2.493484581 | 0.02640374 | 0.999702862 | -4.585507197 |
| NOVA1 | 4.154587351 | 2.334985999 | 0.03869878 | 0.999702862 | -4.59059607 |
| SCRN1 | 4.127655196 | 2.553444623 | 0.024724554 | 0.999702862 | -4.589008156 |
| UBE2Q2 | 4.093311748 | 2.989302206 | 0.010904406 | 0.999702862 | -4.584736589 |
| TDRD5 | 4.051768802 | 2.290165285 | 0.041919741 | 0.999702862 | -4.590753231 |
| KIAA0907 | 4.033327865 | 2.21291507 | 0.046291789 | 0.999702862 | -4.588836691 |
| AGRN | 4.012370013 | 2.477354227 | 0.028481658 | 0.999702862 | -4.589315012 |
| TNFRSF21 | 3.989109436 | 2.28416576 | 0.042369934 | 0.999702862 | -4.590774329 |
| LOC150568 | 3.972199165 | 2.280671448 | 0.042634272 | 0.999702862 | -4.590786624 |
| ZAN | 3.954483528 | 2.26817069 | 0.043592921 | 0.999702862 | -4.590830648 |
| RAB19 | 3.951878172 | 2.188026506 | 0.048428876 | 0.999702862 | -4.588974622 |
| CTBP2 | 3.934373494 | 2.27182114 | 0.038876365 | 0.999702862 | -4.584810401 |
| NAP1L1 | 3.92623792 | 2.21921196 | 0.047549561 | 0.999702862 | -4.591003605 |
| GANC | 3.918666134 | 2.244562228 | 0.045459914 | 0.999702862 | -4.590913945 |
| ATP1A4 | 3.912567733 | 2.805786066 | 0.015410657 | 0.999702862 | -4.585658226 |
| NOD2 | 3.888248293 | 2.19110158 | 0.049973617 | 0.999702862 | -4.59110327 |
| GATA6 | 3.881724758 | 2.21367631 | 0.048017893 | 0.999702862 | -4.591023212 |
| CLCC1 | 3.84877429 | 2.275618718 | 0.041296183 | 0.999702862 | -4.590142115 |
| PLXNA1 | 3.82750813 | 2.660596756 | 0.020239411 | 0.999702862 | -4.586411386 |
| IFITM10 | 3.822383539 | 2.506823185 | 0.026965213 | 0.999702862 | -4.587229333 |
| RAB23 | 3.802924806 | 2.375247096 | 0.034398517 | 0.999702862 | -4.589731477 |
| SKI | 3.752594616 | 2.449115219 | 0.026695044 | 0.999702862 | -4.581294396 |
| ATP6V0D1 | 3.738716519 | 2.740617625 | 0.017419027 | 0.999702862 | -4.58599381 |
| AFF4 | 3.692626139 | 2.25702689 | 0.0427214 | 0.999702862 | -4.590219127 |
| ATPBD4 | 3.659315251 | 2.94436763 | 0.011060567 | 0.999702862 | -4.58255256 |
| TARBP1 | 3.61925824 | 2.538239449 | 0.025434707 | 0.999702862 | -4.587060692 |
| LOC100130691 | 3.567887537 | 2.922184805 | 0.010854741 | 0.999702862 | -4.579176022 |
| ILDR2 | 3.4927227 | 2.83048356 | 0.013801429 | 0.999702862 | -4.583278904 |
| NEK5 | 3.469906196 | 2.18527292 | 0.04867095 | 0.999702862 | -4.588989893 |
| MOXD1 | 3.462044914 | 2.48921059 | 0.027861878 | 0.999702862 | -4.587324195 |
| ASB3 | 3.456658432 | 2.512633267 | 0.026675594 | 0.999702862 | -4.58719809 |
| LRRC32 | 3.404154385 | 2.468335896 | 0.028961981 | 0.999702862 | -4.587436911 |
| HGF | 3.397383643 | 2.627184485 | 0.020441528 | 0.999702862 | -4.584610603 |
| PGR | 3.368764518 | 2.407257194 | 0.03242683 | 0.999702862 | -4.587768392 |
| VSTM2L | 3.344562202 | 2.445025311 | 0.03024002 | 0.999702862 | -4.587563133 |
| BCL11A | 3.332505114 | 2.397293636 | 0.03302861 | 0.999702862 | -4.587822689 |
| KIF17 | 3.322995967 | 2.418125354 | 0.031782431 | 0.999702862 | -4.587709234 |
| GRAMD4 | 3.297843516 | 2.25719359 | 0.042708416 | 0.999702862 | -4.588591809 |
| C6orf170 | 3.29654288 | 2.671353961 | 0.018775548 | 0.999702862 | -4.584317776 |
| TMEM110-MUSTN1 | 3.269784573 | 2.364302606 | 0.035098648 | 0.999702862 | -4.58800289 |
| C6orf222 | 3.253505762 | 2.333009201 | 0.037176574 | 0.999702862 | -4.588174375 |
| ATP5J2-PTCD1 | 3.243434802 | 2.583775313 | 0.021244981 | 0.999702862 | -4.582061419 |
| DYNC1I2 | 3.138720739 | 2.61198391 | 0.02104738 | 0.999702862 | -4.584711788 |
| MYH15 | 3.135308184 | 2.293538089 | 0.039965364 | 0.999702862 | -4.588391376 |
| TMEM110 | 3.131457565 | 2.253796251 | 0.042973768 | 0.999702862 | -4.588610573 |
| CCDC146 | 3.130165759 | 2.257941524 | 0.042650207 | 0.999702862 | -4.588587679 |
| UNQ6494 | 3.103788771 | 2.232555894 | 0.044668525 | 0.999702862 | -4.588727981 |
| FBXO9 | 3.061198316 | 2.241544899 | 0.04394371 | 0.999702862 | -4.588678273 |
| RIMS4 | 3.044741004 | 2.21762099 | 0.045897852 | 0.999702862 | -4.588810632 |
| MUC16 | 3.001482833 | 2.184986415 | 0.048696203 | 0.999702862 | -4.588991482 |
| FOXJ3 | 2.934776036 | 2.667430376 | 0.01801768 | 0.999702862 | -4.581336301 |
| SREK1IP1 | 2.894366853 | 2.373669185 | 0.033139847 | 0.999702862 | -4.586321579 |
| MTHFD1L | 2.893321439 | 2.217040219 | 0.044435308 | 0.999702862 | -4.587396828 |
| SLC1A3 | 2.804757104 | 2.497034735 | 0.025175717 | 0.999702862 | -4.582819782 |
| KDM2B | 2.777525456 | 2.236744198 | 0.042836915 | 0.999702862 | -4.587261111 |
| MIR3675 | 2.770253825 | 2.350661028 | 0.033428797 | 0.999702862 | -4.584110987 |
| BCKDHB | 2.753050821 | 2.239231622 | 0.041363295 | 0.999702862 | -4.585099945 |
| PRKCZ | 2.693785332 | 2.705051618 | 0.014780959 | 0.999702862 | -4.573005894 |
| LARS2-AS1 | 2.686360288 | 2.169075358 | 0.048563235 | 0.999702862 | -4.587727515 |
| MRAP2 | 2.62244176 | 2.155288855 | 0.049814505 | 0.999702862 | -4.587822623 |
| ARHGEF11 | 2.594123378 | 2.270311163 | 0.037907663 | 0.999702862 | -4.583160858 |
| FUT9 | 2.472411483 | 2.185877051 | 0.045758414 | 0.999702862 | -4.585574194 |
| KCNJ6 | 2.467556372 | 2.310586647 | 0.035051042 | 0.999702862 | -4.584790133 |
| PRKCB | -2.297110577 | -2.519856112 | 0.021749933 | 0.999702862 | -4.577568385 |
| RASGRF2 | -2.290177295 | -2.442611523 | 0.02549428 | 0.999702862 | -4.578561084 |
| FUT8 | -3.056923892 | -2.666322503 | 0.018057149 | 0.999702862 | -4.582867898 |
| RGS6 | -2.440380188 | -2.356429726 | 0.031161177 | 0.999702862 | -4.583673901 |
| TM4SF20 | -3.270499994 | -2.552386573 | 0.023594879 | 0.999702862 | -4.585110424 |
| ASTN2 | -4.621563875 | -2.880270166 | 0.010655529 | 0.999702862 | -4.585577429 |
| NIPAL4 | -4.002733648 | -2.746479804 | 0.017228293 | 0.999702862 | -4.585963454 |
| SRGAP1 | -2.549244381 | -2.254189276 | 0.040203909 | 0.999702862 | -4.586088418 |
| LOC401109 | -5.682971721 | -3.255069457 | 0.0066035 | 0.999702862 | -4.586373053 |
| MIR4429 | -6.466960564 | -3.648456583 | 0.003600243 | 0.999702862 | -4.586578678 |
| MYO5A | -2.386573686 | -2.144701341 | 0.049443536 | 0.999702862 | -4.586953896 |
| C1orf43 | -6.254227532 | -3.364837999 | 0.005991335 | 0.999702862 | -4.587333397 |
| ACOX2 | -3.289874571 | -2.33305177 | 0.037173669 | 0.999702862 | -4.588174141 |
| SP6 | -3.312939177 | -2.3034161 | 0.039249307 | 0.999702862 | -4.588337 |
| ABTB1 | -4.312202341 | -2.713610311 | 0.018324883 | 0.999702862 | -4.588373752 |
| FAM107A | -3.215565738 | -2.286448081 | 0.040486966 | 0.999702862 | -4.588430432 |
| NPPB | -4.334717609 | -2.679251198 | 0.019544376 | 0.999702862 | -4.588508425 |
| MIR488 | -5.470200849 | -2.929519721 | 0.013201032 | 0.999702862 | -4.588618454 |
| FAM71F2 | -5.030347966 | -2.86439107 | 0.014861793 | 0.999702862 | -4.588823492 |
| MED7 | -4.85736126 | -2.78403865 | 0.01720029 | 0.999702862 | -4.589080782 |
| MRPL36 | -4.068308713 | -2.524630128 | 0.026087083 | 0.999702862 | -4.589123977 |
| LOC100129480 | -7.199672345 | -3.42059716 | 0.006156023 | 0.999702862 | -4.589436574 |
| SARS | -4.20073146 | -2.430165532 | 0.031082922 | 0.999702862 | -4.589506862 |
| IGJ | -4.924180222 | -2.637171274 | 0.022455798 | 0.999702862 | -4.589562787 |
| FLJ39653 | -3.962516142 | -2.415921542 | 0.031912097 | 0.999702862 | -4.589564987 |
| TIGD6 | -6.977279923 | -3.314937506 | 0.007384377 | 0.999702862 | -4.589638467 |
| MGC72080 | -6.813781191 | -3.237258513 | 0.008445732 | 0.999702862 | -4.589791277 |
| C1orf189 | -6.786596362 | -3.224342877 | 0.008636787 | 0.999702862 | -4.589817045 |
| ZNF860 | -3.849625534 | -2.239514618 | 0.042616562 | 0.999702862 | -4.589858625 |
| DR1 | -4.46335555 | -2.533949649 | 0.027066437 | 0.999702862 | -4.589909968 |
| FBXO48 | -6.639039173 | -3.154237784 | 0.009753568 | 0.999702862 | -4.589958709 |
| PPID | -4.436967739 | -2.51050606 | 0.028236241 | 0.999702862 | -4.589989713 |
| LOC148709 | -4.641868305 | -2.505358393 | 0.028499635 | 0.999702862 | -4.590007265 |
| SETMAR | -4.747705458 | -2.487639885 | 0.029424689 | 0.999702862 | -4.590067795 |
| LOC440905 | -6.470319935 | -3.074078504 | 0.01121235 | 0.999702862 | -4.590124397 |
| CETN4P | -6.448460501 | -3.063692987 | 0.011416936 | 0.999702862 | -4.590146152 |
| CCDC13-AS1 | -4.299262598 | -2.458235284 | 0.031024757 | 0.999702862 | -4.590168629 |
| MIR3128 | -6.309855263 | -2.997841007 | 0.012805306 | 0.999702862 | -4.590285628 |
| TFR2 | -6.294620749 | -2.99060302 | 0.012967988 | 0.999702862 | -4.590301118 |
| F2R | -5.003513633 | -2.413642028 | 0.033613796 | 0.999702862 | -4.590322423 |
| GHRLOS2 | -4.35892282 | -2.409256766 | 0.033879429 | 0.999702862 | -4.590337602 |
| OR10K2 | -6.240314329 | -2.964801792 | 0.013565098 | 0.999702862 | -4.590356597 |
| CENPO | -4.216069842 | -2.399003674 | 0.034508457 | 0.999702862 | -4.590373128 |
| LYSMD3 | -4.148912615 | -2.375497264 | 0.035993501 | 0.999702862 | -4.590454768 |
| CRBN | -4.583470572 | -2.367900188 | 0.03648652 | 0.999702862 | -4.590481209 |
| MIR92B | -6.103287808 | -2.899699867 | 0.015198166 | 0.999702862 | -4.590498358 |
| RNF186 | -4.514781657 | -2.358811798 | 0.037084884 | 0.999702862 | -4.590512876 |
| ZNF354C | -6.077527863 | -2.8874612 | 0.015526628 | 0.999702862 | -4.59052529 |
| NAT6 | -6.06608919 | -2.882026634 | 0.015674764 | 0.999702862 | -4.590537277 |
| DUSP28 | -6.033423002 | -2.866506779 | 0.016105684 | 0.999702862 | -4.590571607 |
| PARK7 | -4.095790801 | -2.336305004 | 0.038607693 | 0.999702862 | -4.590591457 |
| RAPGEF4-AS1 | -5.961931959 | -2.832541059 | 0.017090782 | 0.999702862 | -4.590647233 |
| KNCN | -5.938599455 | -2.82145568 | 0.017425211 | 0.999702862 | -4.590672061 |
| PMS2P3 | -5.930737338 | -2.817720352 | 0.017539373 | 0.999702862 | -4.590680443 |
| SKP1 | -4.022079076 | -2.299464396 | 0.041231004 | 0.999702862 | -4.590720556 |
| FNDC9 | -5.842064576 | -2.775591519 | 0.018880047 | 0.999702862 | -4.590775537 |
| HP07349 | -5.805010982 | -2.757987187 | 0.019470231 | 0.999702862 | -4.590815574 |
| POLR2H | -4.126738443 | -2.257604199 | 0.04441929 | 0.999702862 | -4.590867904 |
| CA14 | -5.609794354 | -2.665238877 | 0.022897559 | 0.999702862 | -4.591029378 |
| THAP9 | -4.162374739 | -2.20790802 | 0.048510577 | 0.999702862 | -4.591043654 |
| PCSK9 | -3.997831038 | -2.205776431 | 0.048693856 | 0.999702862 | -4.59105121 |
| EREG | -3.848118866 | -2.20265074 | 0.048963801 | 0.999702862 | -4.591062293 |
| NDUFA4 | -3.835084974 | -2.202326888 | 0.048991851 | 0.999702862 | -4.591063442 |
| ZNF890P | -5.574908836 | -2.648664608 | 0.023570457 | 0.999702862 | -4.591068082 |
| INSL5 | -3.897054103 | -2.199008551 | 0.049280148 | 0.999702862 | -4.591075211 |
| HRG | -5.564784619 | -2.643854546 | 0.023769393 | 0.999702862 | -4.591079342 |
| MIR4271 | -5.5360529 | -2.630203976 | 0.024343082 | 0.999702862 | -4.591111364 |
| PRMT7 | -5.509555098 | -2.617614749 | 0.024884334 | 0.999702862 | -4.591140984 |
| LOC100507582 | -5.494141273 | -2.610291571 | 0.025204653 | 0.999702862 | -4.591158253 |
| YIPF5 | -5.491853096 | -2.609204448 | 0.025252551 | 0.999702862 | -4.591160818 |
| CRIP3 | -5.486012218 | -2.60642942 | 0.025375227 | 0.999702862 | -4.591167371 |
| SH3RF3-AS1 | -5.475733431 | -2.601545921 | 0.025592547 | 0.999702862 | -4.591178912 |
| LOC100506229 | -5.40284809 | -2.566917763 | 0.027187278 | 0.999702862 | -4.591261101 |
| UQCRC1 | -5.394605599 | -2.563001718 | 0.027373695 | 0.999702862 | -4.591270435 |
| SDE2 | -5.392317423 | -2.561914595 | 0.02742567 | 0.999702862 | -4.591273027 |
| MIR3123 | -5.392317423 | -2.561914595 | 0.02742567 | 0.999702862 | -4.591273027 |
| MIR3912 | -5.392317423 | -2.561914595 | 0.02742567 | 0.999702862 | -4.591273027 |
| SRA1 | -5.392317423 | -2.561914595 | 0.02742567 | 0.999702862 | -4.591273027 |
| SBDSP1 | -5.36923381 | -2.550947465 | 0.027955479 | 0.999702862 | -4.591299213 |
| GUK1 | -5.301169535 | -2.518609818 | 0.029577155 | 0.999702862 | -4.591376773 |
| SAYSD1 | -5.276567561 | -2.506921308 | 0.030185832 | 0.999702862 | -4.591404933 |
| IQCF2 | -5.263034406 | -2.500491644 | 0.030525894 | 0.999702862 | -4.591420452 |
| MIR3115 | -5.240791332 | -2.489923859 | 0.031093022 | 0.999702862 | -4.591446002 |
| SNORD11B | -5.240791332 | -2.489923859 | 0.031093022 | 0.999702862 | -4.591446002 |
| SPINK14 | -5.161887682 | -2.452436375 | 0.033189527 | 0.999702862 | -4.591537062 |
| C7orf62 | -5.113742166 | -2.429562221 | 0.034536211 | 0.999702862 | -4.591592943 |
| EXOC8 | -5.109433241 | -2.427515031 | 0.034659312 | 0.999702862 | -4.591597955 |
| TRIL | -5.104037066 | -2.424951283 | 0.03481408 | 0.999702862 | -4.591604235 |
| MIR3921 | -5.070866331 | -2.409191716 | 0.0357804 | 0.999702862 | -4.591642904 |
| C1QB | -5.061467633 | -2.404726351 | 0.036058933 | 0.999702862 | -4.591653881 |
| MIR572 | -5.055282436 | -2.401787736 | 0.036243387 | 0.999702862 | -4.591661109 |
| HCRTR1 | -5.038309357 | -2.393723749 | 0.036754299 | 0.999702862 | -4.591680963 |
| SLC35E2 | -5.033423002 | -2.391402219 | 0.036902683 | 0.999702862 | -4.591686685 |
| KISS1 | -5.027480736 | -2.388579022 | 0.037083919 | 0.999702862 | -4.591693645 |
| FAM193B | -5.014950341 | -2.382625774 | 0.03746894 | 0.999702862 | -4.591708333 |
| EIF2B4 | -4.981852653 | -2.366900912 | 0.038504761 | 0.999702862 | -4.591747203 |
| GNB2 | -4.981852653 | -2.366900912 | 0.038504761 | 0.999702862 | -4.591747203 |
| RP9 | -4.972692654 | -2.362548954 | 0.038796324 | 0.999702862 | -4.591757979 |
| GSTA2 | -4.945443836 | -2.349602917 | 0.039676411 | 0.999702862 | -4.59179008 |
| OXCT2 | -4.89077093 | -2.32362757 | 0.041501145 | 0.999702862 | -4.591854692 |
| SNORA24 | -4.89077093 | -2.32362757 | 0.041501145 | 0.999702862 | -4.591854692 |
| SNHG8 | -4.89077093 | -2.32362757 | 0.041501145 | 0.999702862 | -4.591854692 |
| SPATA24 | -4.863498 | -2.310670076 | 0.042441579 | 0.999702862 | -4.591887022 |
| HYMAI | -4.863498 | -2.310670076 | 0.042441579 | 0.999702862 | -4.591887022 |
| LOC100128071 | -4.857980995 | -2.308048922 | 0.042634315 | 0.999702862 | -4.591893569 |
| GNPDA2 | -4.855360295 | -2.306803815 | 0.042726165 | 0.999702862 | -4.591896681 |
| PPBP | -4.823929147 | -2.291870734 | 0.043842802 | 0.999702862 | -4.591934041 |
| TPST2 | -4.815916936 | -2.288064096 | 0.044131934 | 0.999702862 | -4.591943577 |
| LOC646762 | -4.807354922 | -2.283996244 | 0.044442944 | 0.999702862 | -4.591953775 |
| IL1RN | -4.793233814 | -2.277287241 | 0.044960518 | 0.999702862 | -4.591970605 |
| SOX11 | -4.793233814 | -2.277287241 | 0.044960518 | 0.999702862 | -4.591970605 |
| SNORA16B | -4.781359714 | -2.271645802 | 0.045400237 | 0.999702862 | -4.591984771 |
| OST4 | -4.781359714 | -2.271645802 | 0.045400237 | 0.999702862 | -4.591984771 |
| MIR2467 | -4.781359714 | -2.271645802 | 0.045400237 | 0.999702862 | -4.591984771 |
| C1orf123 | -4.740240726 | -2.252109983 | 0.046955252 | 0.999702862 | -4.592033911 |
| TMEM150A | -4.724892762 | -2.244818096 | 0.047548733 | 0.999702862 | -4.592052287 |
| MATN1-AS1 | -4.718818247 | -2.241932066 | 0.047785616 | 0.999702862 | -4.592059565 |
| C6orf130 | -4.714688674 | -2.239970087 | 0.047947302 | 0.999702862 | -4.592064514 |
| HLA-DRB5 | -4.6794801 | -2.223242333 | 0.049347376 | 0.999702862 | -4.592106763 |
| RGS14 | -4.669851398 | -2.218667693 | 0.049737057 | 0.999702862 | -4.592118333 |
